# Supplementary material for: Probiotic Therapy with Lactobacillus acidophilus and Bifidobacterium animalis subsp. lactis Results in Infarct Size Limitation in Rats with Obesity and Chemically Induced Colitis
Source: MDPI journal article supplement (doi:10.3390/microorganisms10112293), 2022-11-18
Supplement: s1 [file s1]

**Table S1.** The values of heart rate (beats/min) in the experimental groups. Data are mean  $\pm$  SD. Group legends: controls (CON), diet-induced obesity (DIO), diet-induced obesity + chemically induced colitis (DCC), diet-induced obesity + chemically induced colitis + antibiotic-induced dysbiosis (DCA), diet-induced obesity + chemically induced colitis + antibiotic-induced dysbiosis + treatment with *Lactobacillus acidophilus* (LA-5) and *Bifidobacterium animalis subsp. lactis* (BB-12) (PRK1), diet-induced obesity + chemically induced colitis + antibiotic-induced dysbiosis + treatment with *Saccharomyces boulardii* (PRK2), diet-induced obesity + chemically induced colitis + antibiotic-induced dysbiosis + treatment with *Enterococcus faecium* L3 (PRK3).

| Groups | Baseline      | Reperfusion   |               |              |               |              |               |              |
|--------|---------------|---------------|---------------|--------------|---------------|--------------|---------------|--------------|
|        |               | 15 min        | 30 min        | 45 min       | 60 min        | 75 min       | 90 min        | 120 min      |
| CON    | 366 $\pm$ 85  | 414 $\pm$ 38  | 369 $\pm$ 83  | 338 $\pm$ 72 | 298 $\pm$ 19  | 297 $\pm$ 22 | 307 $\pm$ 26  | 295 $\pm$ 25 |
| DIO    | 444 $\pm$ 72  | 430 $\pm$ 57  | 364 $\pm$ 68  | 367 $\pm$ 74 | 357 $\pm$ 39  | 351 $\pm$ 56 | 403 $\pm$ 111 | 387 $\pm$ 84 |
| DCC    | 401 $\pm$ 92  | 398 $\pm$ 53  | 384 $\pm$ 135 | 358 $\pm$ 79 | 359 $\pm$ 87  | 373 $\pm$ 86 | 364 $\pm$ 74  | 352 $\pm$ 53 |
| DCA    | 370 $\pm$ 124 | 385 $\pm$ 59  | 352 $\pm$ 85  | 363 $\pm$ 47 | 401 $\pm$ 76  | 391 $\pm$ 79 | 411 $\pm$ 95  | 385 $\pm$ 76 |
| PRK1   | 391 $\pm$ 109 | 401 $\pm$ 64  | 353 $\pm$ 83  | 366 $\pm$ 76 | 351 $\pm$ 82  | 384 $\pm$ 62 | 398 $\pm$ 81  | 376 $\pm$ 65 |
| PRK2   | 461 $\pm$ 105 | 435 $\pm$ 99  | 364 $\pm$ 104 | 411 $\pm$ 91 | 410 $\pm$ 99  | 413 $\pm$ 96 | 402 $\pm$ 97  | 395 $\pm$ 71 |
| PRK3   | 416 $\pm$ 126 | 414 $\pm$ 109 | 421 $\pm$ 141 | 392 $\pm$ 97 | 397 $\pm$ 105 | 399 $\pm$ 59 | 406 $\pm$ 102 | 389 $\pm$ 75 |
